## Anemonefish oxygenate their anemone hosts at night

Joseph T. Szczebak, Raymond P. Henry, Fuad A. Al-Horani and Nanette E. Chadwick

10.1242/jeb.087601

There was an error published in *J. Exp. Biol.* **216**, 970-976.

Fig. 3 included some additional text. The correct figure is displayed below.

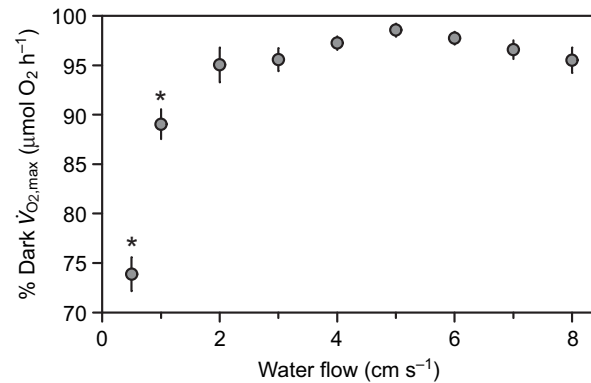

Fig. 3. Effects of water flow rate on the dark maximum oxygen uptake ( $\dot{V}_{O_2,max}$ , mean  $\pm$  1 s.e.m.) of bulb-tentacle sea anemones (*E. quadricolor*) in flow-through respirometry. Mean  $\dot{V}_{O_2,max}$  =  $114.21 \pm 13.89$   $\mu\text{mol O}_2 \text{ h}^{-1}$ .  $\dot{V}_{O_2,max}$  values at 0.5 and 1.0  $\text{cm s}^{-1}$  were significantly different (\* $P < 0.05$ ).

We apologise to the authors and readers for any confusion that this error may have caused.
